# Supplementary material
Source: PubMed Central journal article supplement (PMC6172452)

**Loss of CHD1 causes DNA repair defects and enhances prostate cancer therapeutic responsiveness**

Vijayalakshmi Kari, Wael Yassin Mansour, Sanjay Kumar Raul, Simon J Baumgart, Andreas Mund, Marian Grade, Hüseyin Sirma, Ronald Simon, Hans Will, Matthias Dobbstein, Ekkehard Dikomey, Steven A Johnsen

**Appendix**

Appendix Figure S1

# Appendix Figure S1

Mock -NCS\_  $\gamma$ H2AX/CHD1

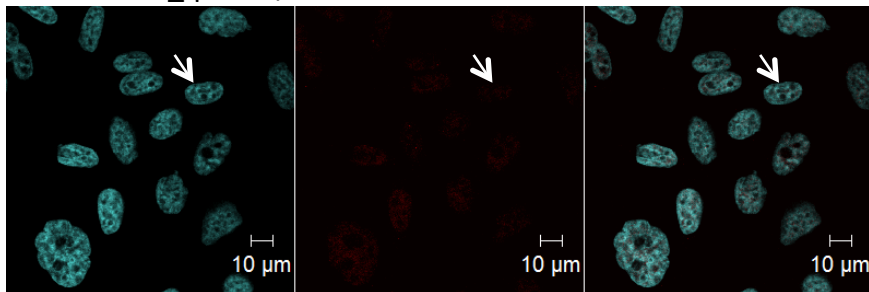

Mock +NCS\_  $\gamma$ H2AX/CHD1

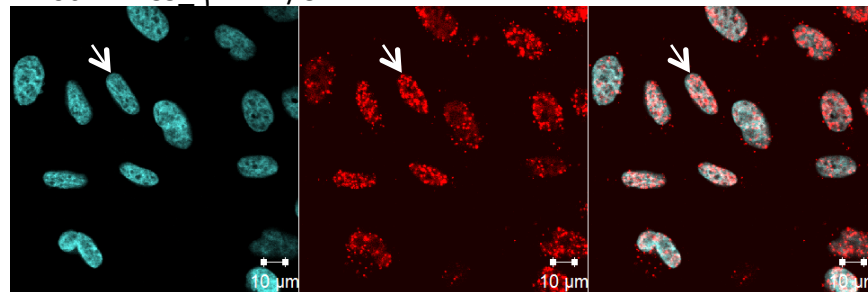

siCHD1 -NCS\_  $\gamma$ H2AX/CHD1

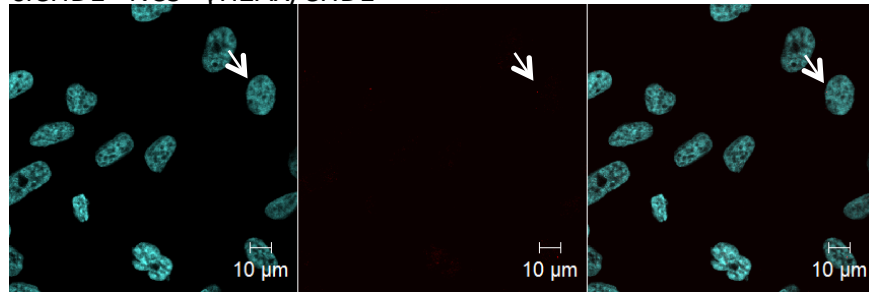

siCHD1 +NCS\_  $\gamma$ H2AX/CHD1

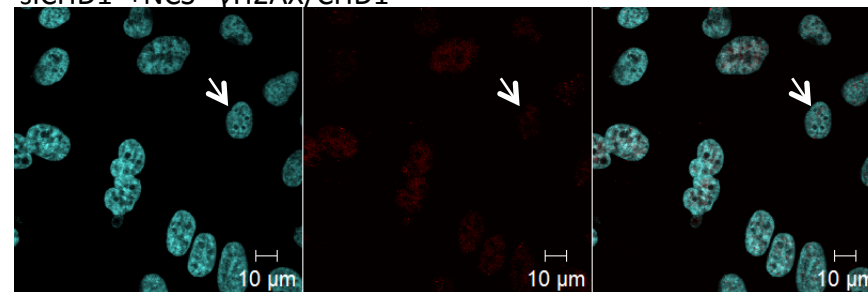

Mock -NCS\_  $\gamma$ H2AX/53BP1

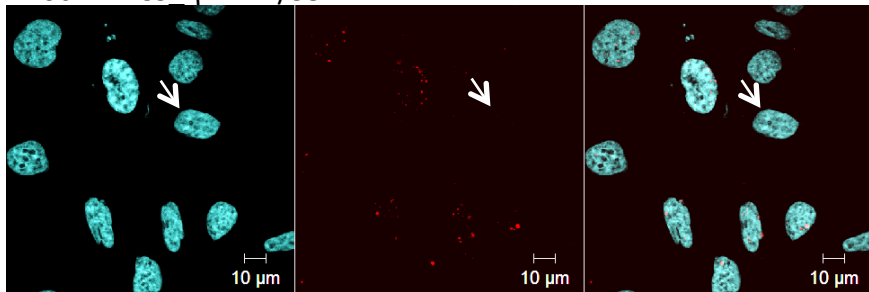

Mock +NCS\_  $\gamma$ H2AX/53BP1

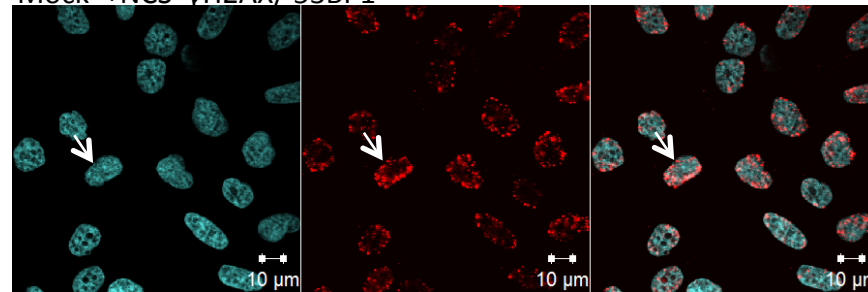

siCHD1 -NCS\_  $\gamma$ H2AX/53BP1

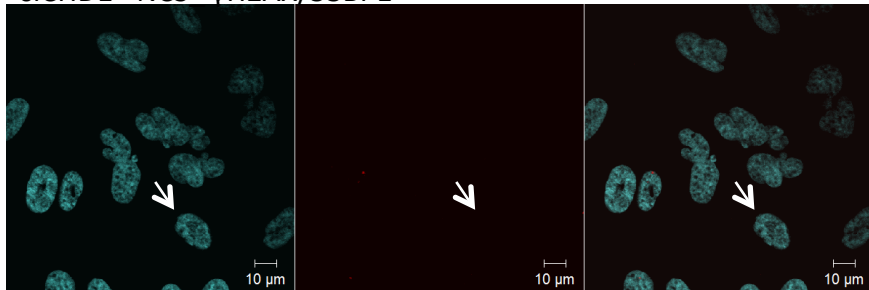

siCHD1 +NCS\_  $\gamma$ H2AX/53BP1

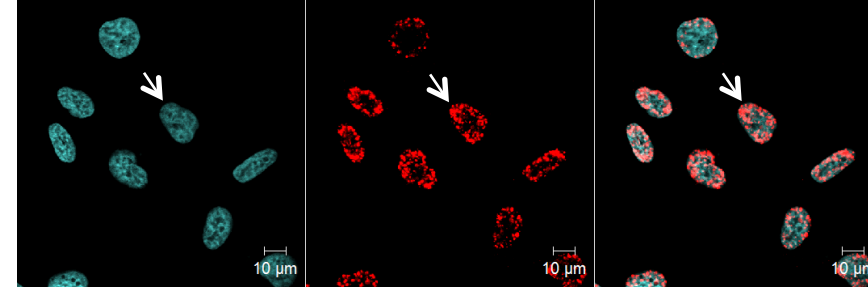

Supplement: EMBR-19-e46783-s001.pdf [file EMBR-19-e46783-s001.pdf]
